# Supplementary material for: Epstein–Barr Virus‐Encoded MicroRNA‐BART18‐3p Promotes Colorectal Cancer Progression by Targeting De Novo Lipogenesis
Source: PubMed Central journal article supplement (PMC9762317; doi:10.1002/advs.202202116), 2022-10-28
Supplement: ADVS-9-2202116-s001.pdf [file ADVS-9-2202116-s001.pdf]

## Supporting Information

for *Adv. Sci.*, DOI 10.1002/adv.202202116

Epstein–Barr Virus-Encoded *MicroRNA-BART18-3p* Promotes Colorectal Cancer Progression by Targeting De Novo Lipogenesis

*Qingtao Meng, Hao Sun, Shenshen Wu, Giuseppe Familiari, Michela Relucenti, Michael Aschner, Xiaobo Li\* and Rui Chen\**

Supplementary Figures

**Figure. S1 Expression profile of differentially expression microRNAs**

(A) Heatmap of differentially expressed miRNAs across ANT, ADE and CRC samples (n = 6/group). (B) Venn diagram showing the pattern of significantly altered miRNAs among the 3 types of samples. (C) Heatmap showing the levels of the 3 common differentially expressed miRNAs from the overlapping region of the Venn diagrams.

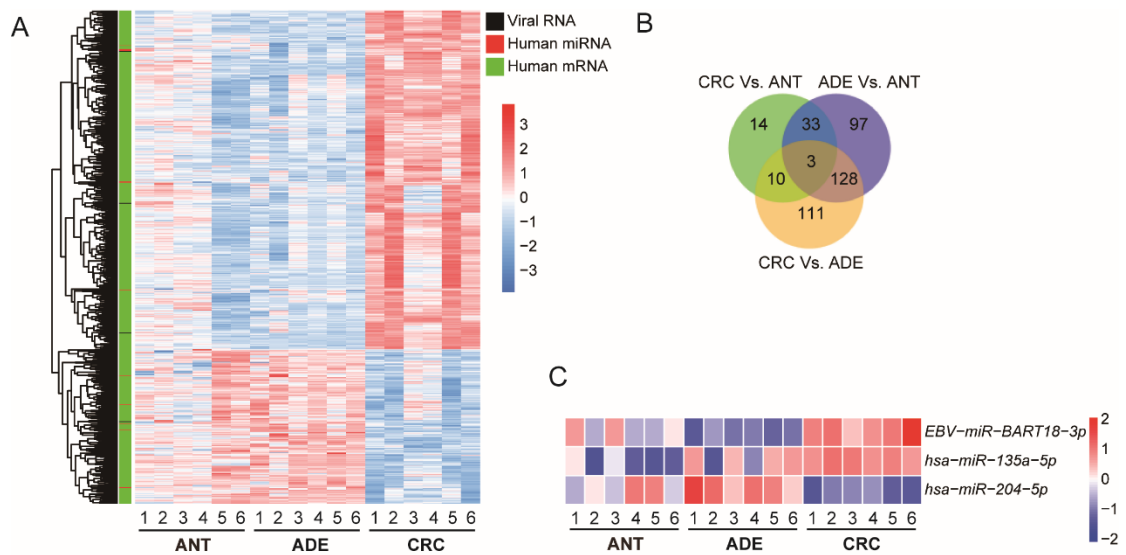

---

**Figure. S2 *EBV-miR-BART18-3p* expression is positively correlated with CRC progression.** (A) *EBV-miR-BART18-3p* expression levels in fresh tissues from the testing and validation sets for CRC (CRC) and adjacent noncancerous (ANT) were measured by PCR. Data are presented as  $-\Delta\Delta Ct$  ( $***P < 0.001$ , *t*-test, 3 technical replicates each). (B) Receiver operating characteristic (ROC) curves according to the expression levels of *EBV-miR-BART18-3p*. (C) Immune reactive scores of the testing and validation sets for *EBV-miR-BART18-3p* levels in tissue microarrays (TMAs). (D) Kaplan–Meier curves of overall survival in the testing and validation sets of CRC patients according to tumoral *EBV-miR-BART18-3p* levels in TMAs (Log-rank test).

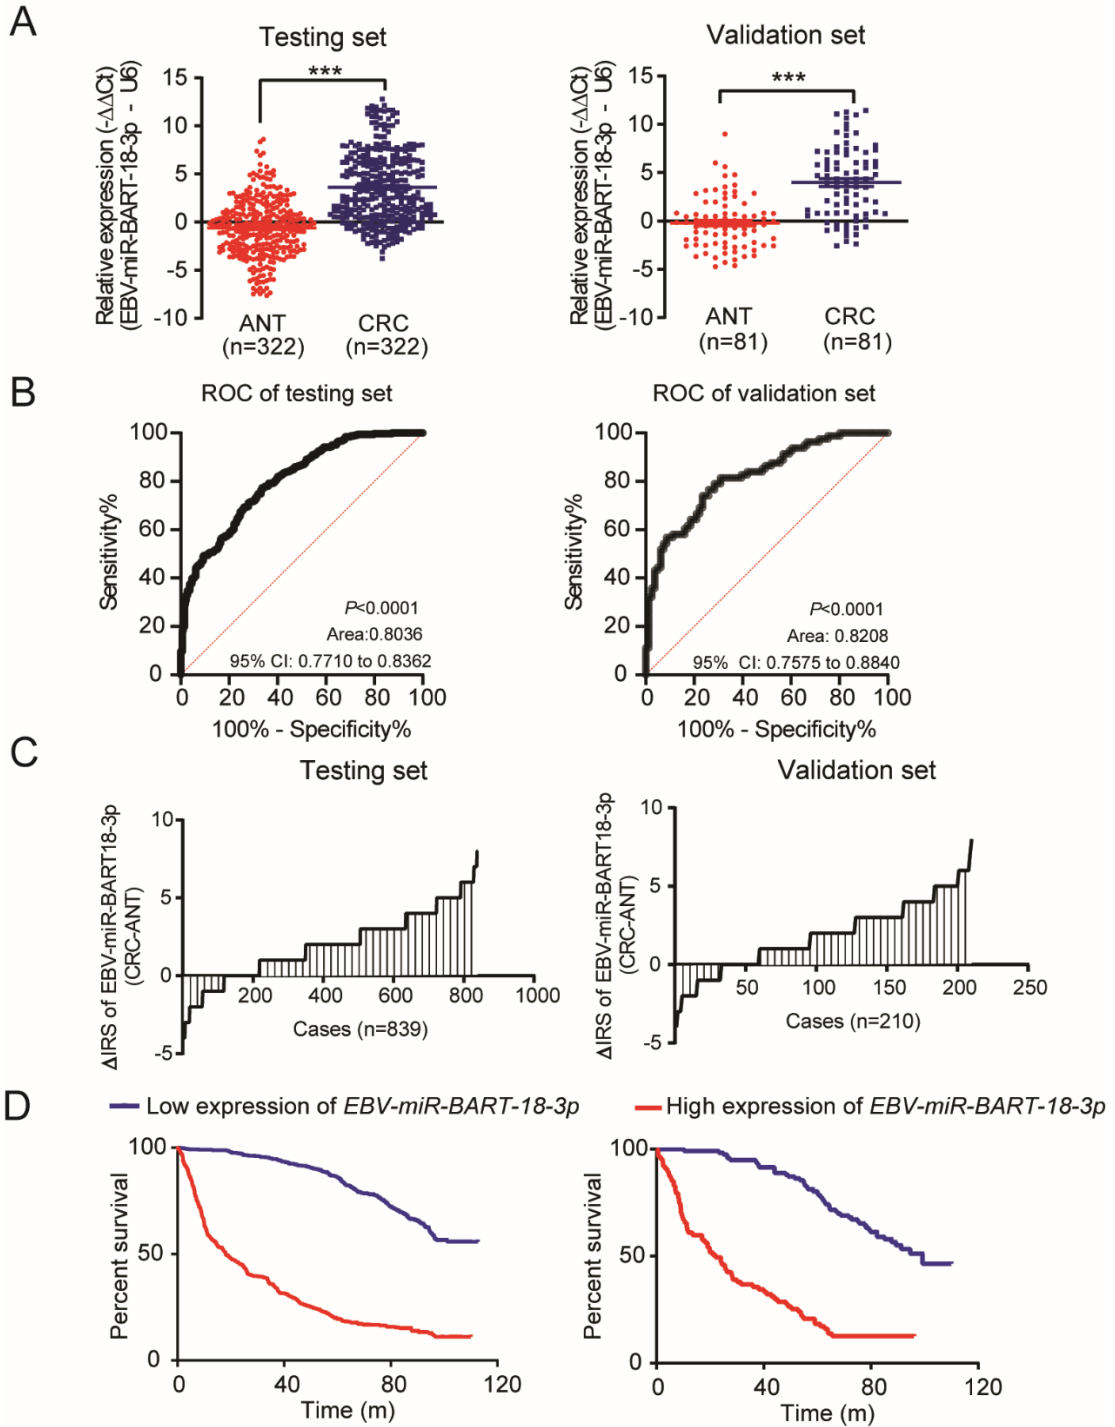

**Figure. S3 EBV-miR-BART18-3p expression levels in the serum of healthy donors and CRC patients at different pathological stages and corresponding ROC curves. (A)T, (B) N, (C) M (*t*-test, 3 technical replicates each)**

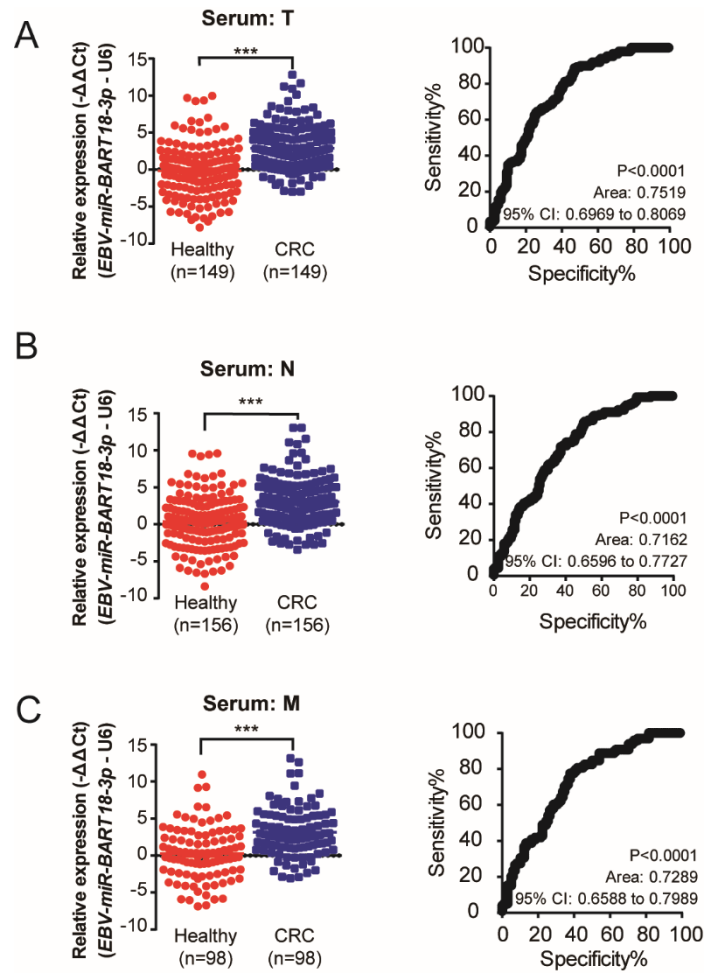

**Figure. S4** *EBV-miR-BART18-3p* expression levels in CRC cells and human normal colonic mucosal epithelial (NCM460) cells. Data were obtained by PCR analysis and are presented as  $-\Delta\Delta Ct$  (n = 3/group).

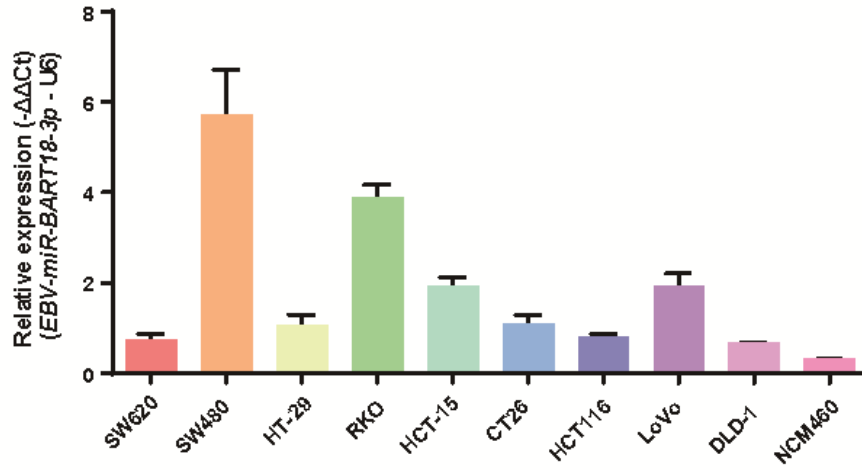

**Figure. S5 EBV-miR-BART18-3p enhances CRC malignant phenotypes *in vitro* and *in vivo*.** (A) Migratory and invasive capacities in EBV-miR-BART18-3p NC and OEX SW620 cells (*t*-test, n=3/group). (B) Migratory and invasive capacities in EBV-miR-BART18-3p NC and KD RKO cells (*t*-test, n=3/group). (C and D) Tumor volume of DLD-1 and SW480 cell xenografts in mice (*t*-test, n=3/group). (E and F) Representative images of SW620 or RKO cell xenografts, and tumor volumes in mice. (G and H) Luciferase activity of xenograft, liver and lung tissues from mice following subcutaneous injection of SW620 or RKO cells (*t*-test, n=3/group). \**P* < 0.05 \*\**P* < 0.01

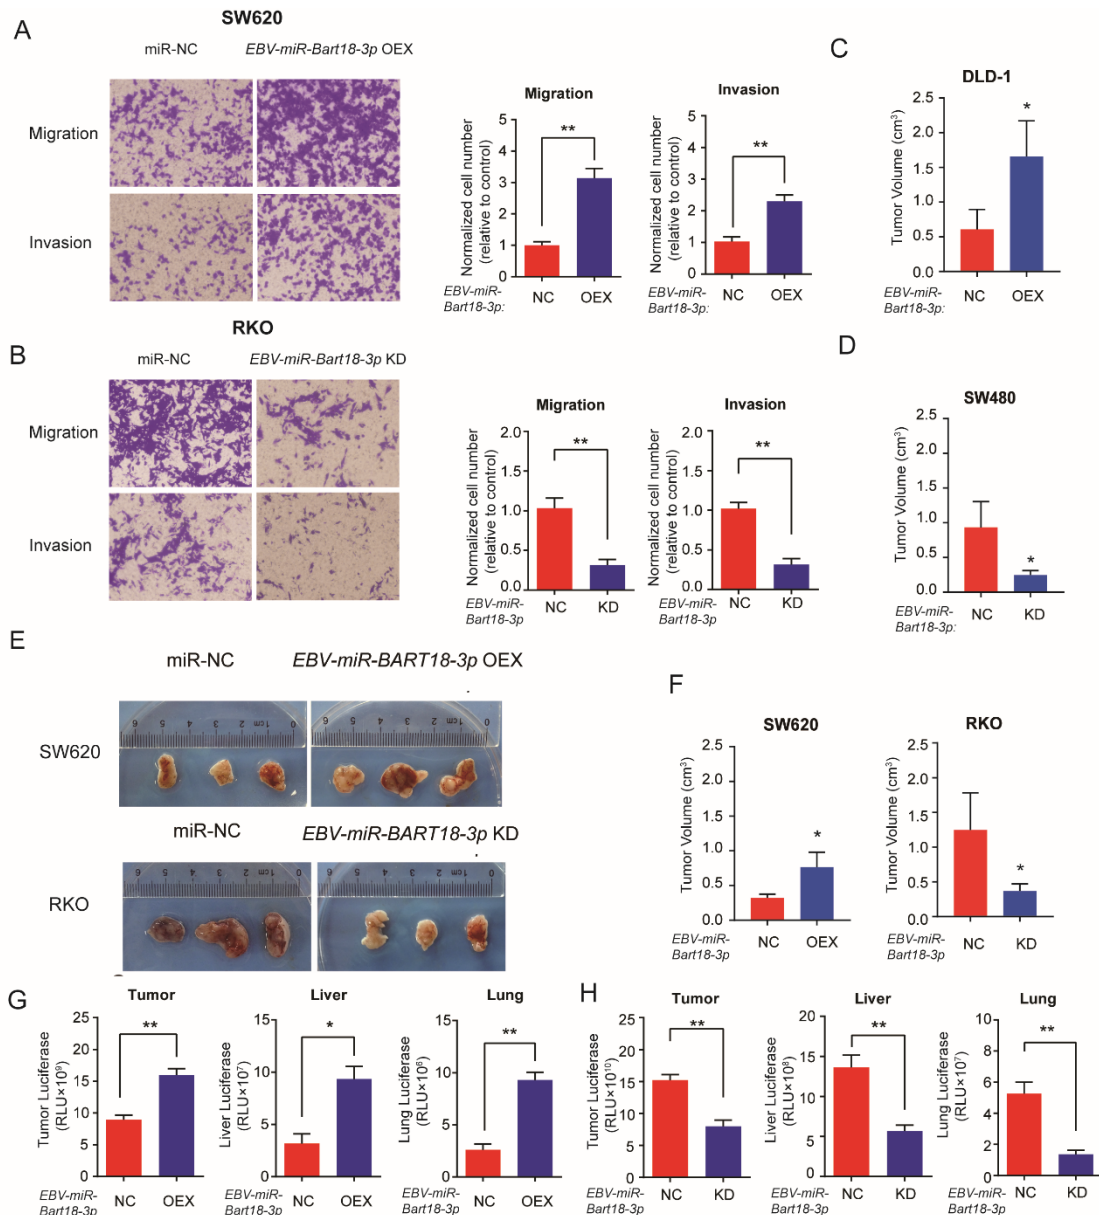

**Figure. S6 Venn diagrams of gene number in the original black module and the secondary turquoise module in WGCNA**

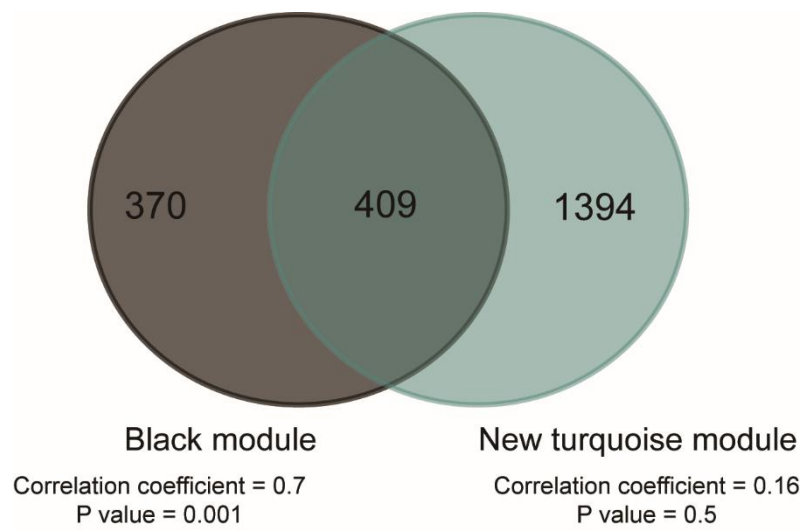



**Figure. S7 Schematic and binding abilities of transcription factors to *EBV-miR-BART18-3p*. (A) CBP (B) FIH (C) PCAF (D) PHD1 (E) PHD2 (F) PHD3 (G) VHL (n.s., no significance, *t*-test, n=3/group).**

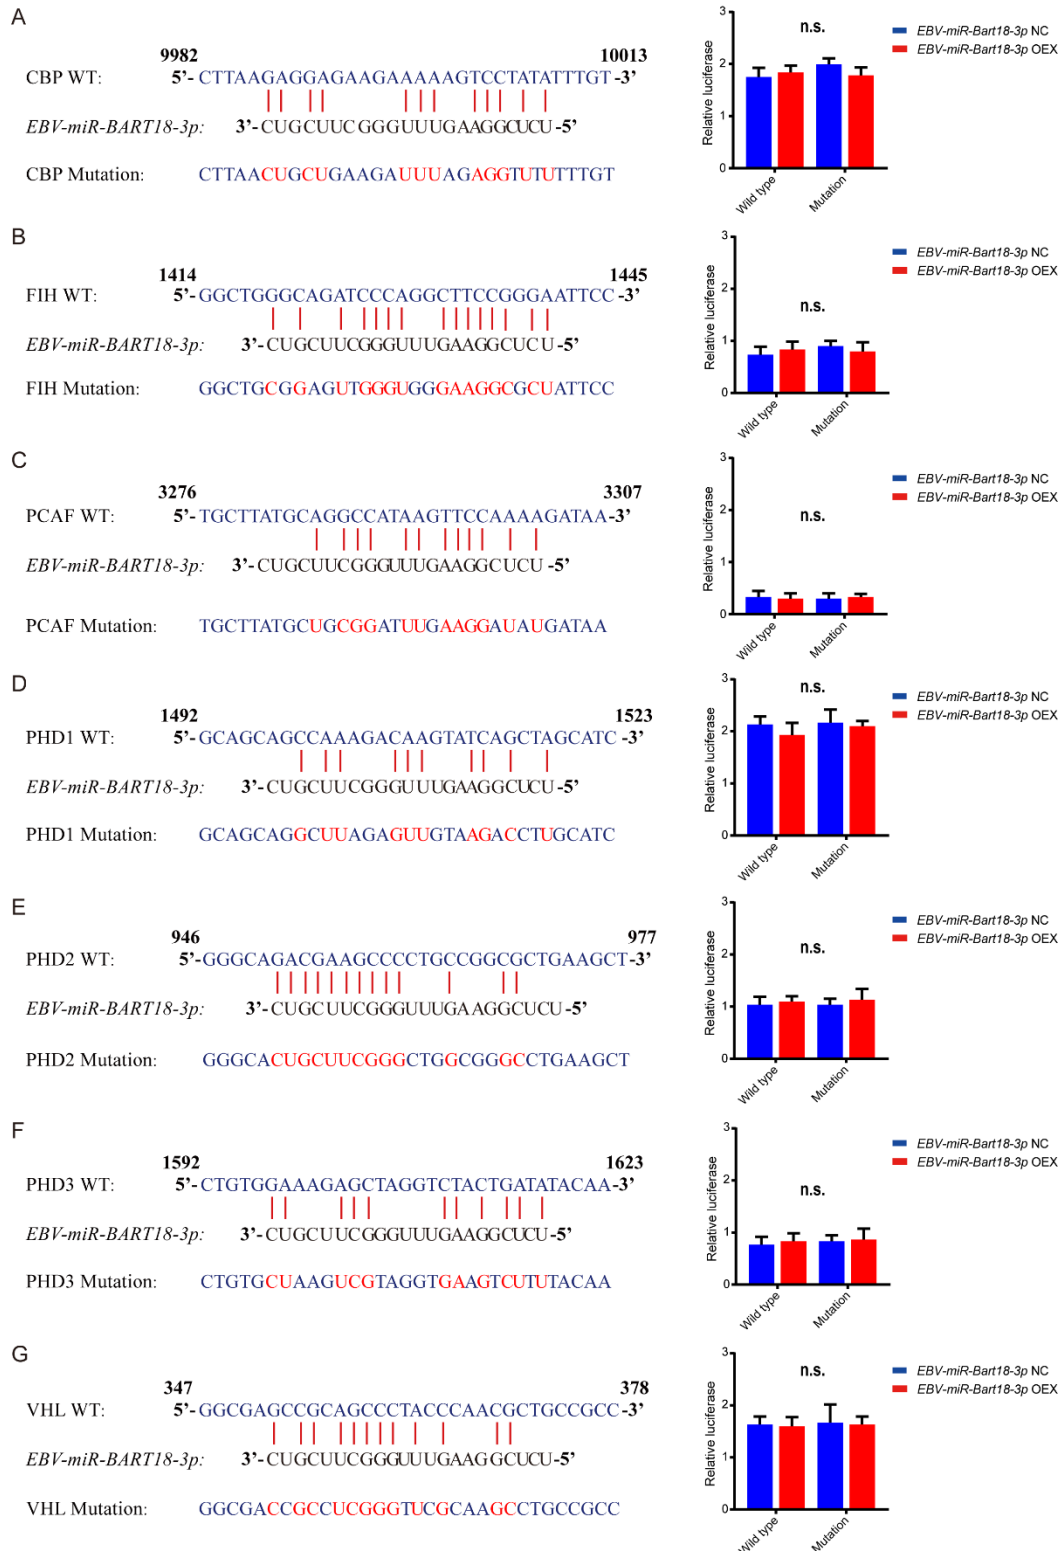

**Figure. S8 SIRT1 overexpression suppresses HIF-1alpha binding to the LDHA promoter.** The expression of LDHA were detected with SIRT1 overexpression in hypoxic DLD-1 (A) and SW480 cells (B) by qRT-PCR assay. \* $P < 0.05$  \*\* $P < 0.01$

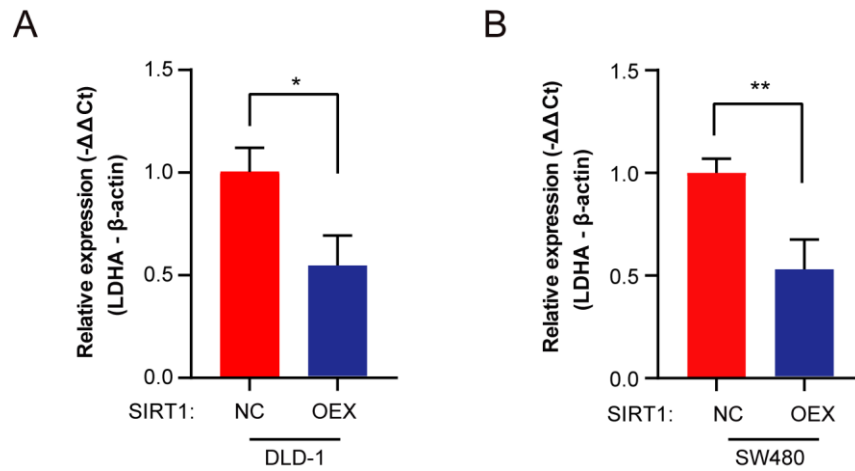

**Figure. S9 Intracellular and extracellular pyruvate levels.** (n.s. no significance,  $P > 0.05$ ,  $t$ -test, 3 technical replicates each).

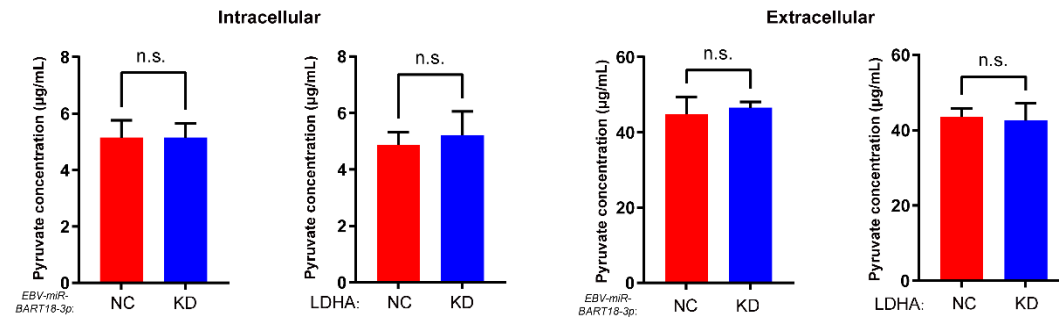

**Figure. S10 Immune reactive scores of FASN staining in TMAs, and the overall survival time of CRC patients according to the FASN expression levels. (log-rank test).**

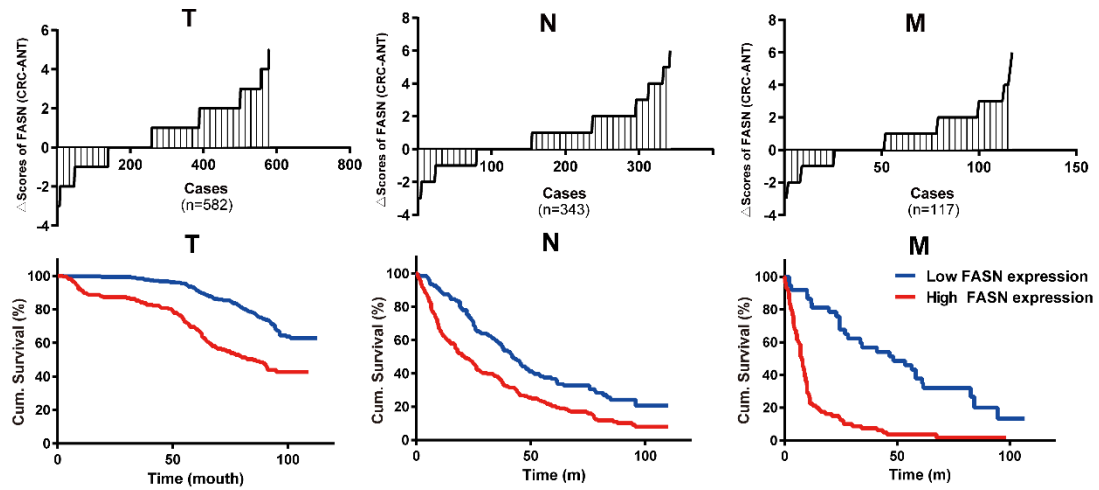

**Figure. S11 Total H3 acetylation is not affected by *EBV-miR-BART18-3p* overexpression or knockdown.** Western blot assays showed protein levels of H3K9ac, H3K14ac, H3K27ac in hypoxia-treated CRC cells (*EBV-miR-BART18-3p* NC versus KD; or *EBV-miR-BART18-3p* NC versus OEX). H3 was used as the loading control.

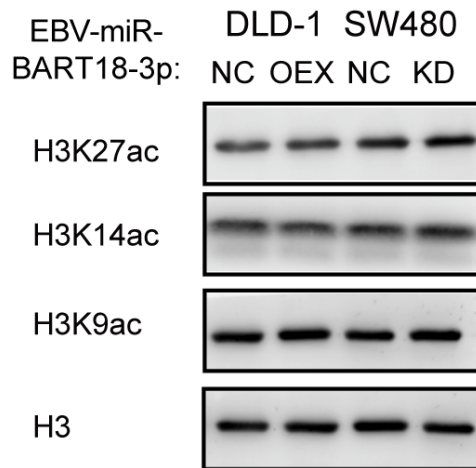

**Figure. S12 EBV-miR-BART18-3p enhances FASN-mediated lipid synthesis in SW480 cells.** (A) lipid contents were measured and quantified in SW480 cells (one-way ANOVA, n=3/group). (B) lipid contents were measured and quantified in hypoxia-treated SW480 cells (one-way ANOVA, n=3/group). \* $P < 0.05$ , \*\* $P < 0.01$ , \*\*\* $P < 0.001$ .

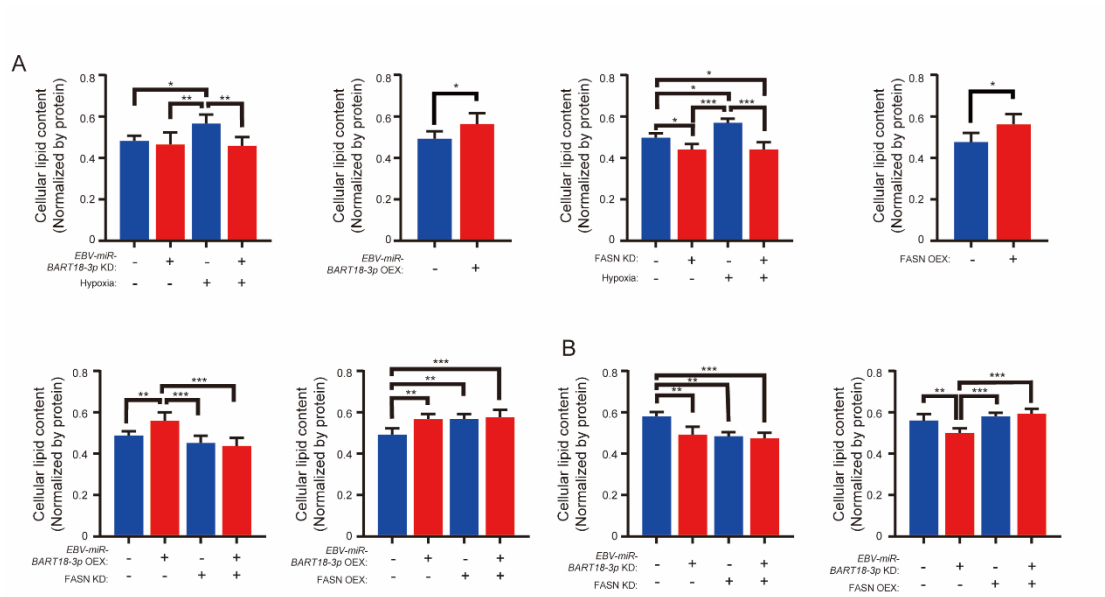

**Figure. S13 EBV-miR-BART18-3p enhances FASN-mediated triglyceride synthesis in DLD-1 cells. (A) Triglyceride contents were measured and quantified in DLD-1 cells (one-way ANOVA, n=3/group). (B) Triglyceride contents were measured and quantified in the indicated hypoxic cultured DLD-1 cells (one-way ANOVA, n=3/group). \* $P < 0.05$ , \*\* $P < 0.01$**

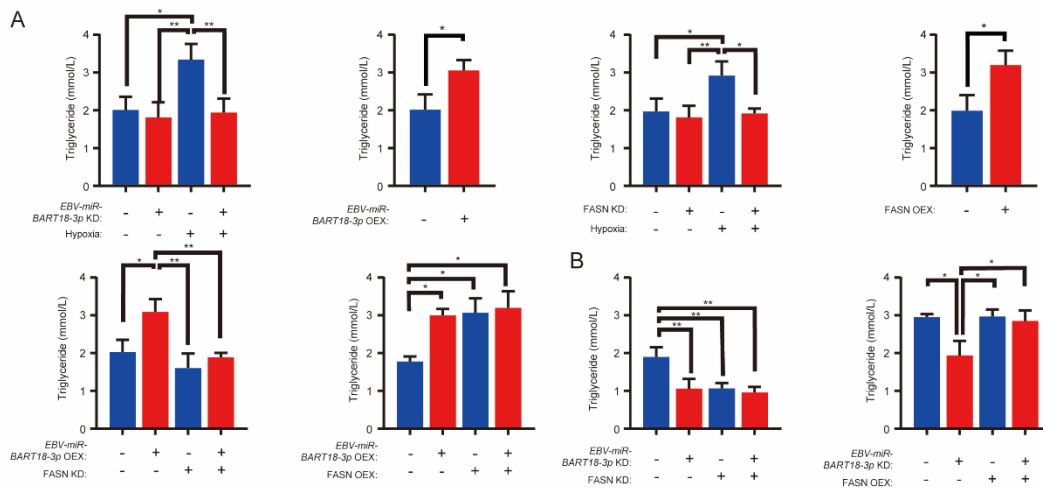

**Figure. S14 EBV-miR-BART18-3p enhances FASN-mediated triglyceride synthesis in SW480 cells. (A)** Triglyceride contents were measured and quantified in SW480 cells (one-way ANOVA, n=3/group). **(B)** Triglyceride contents were measured and quantified in hypoxia-treated SW480 cells (one-way ANOVA, n=3/group). \* $P < 0.05$ , \*\* $P < 0.01$

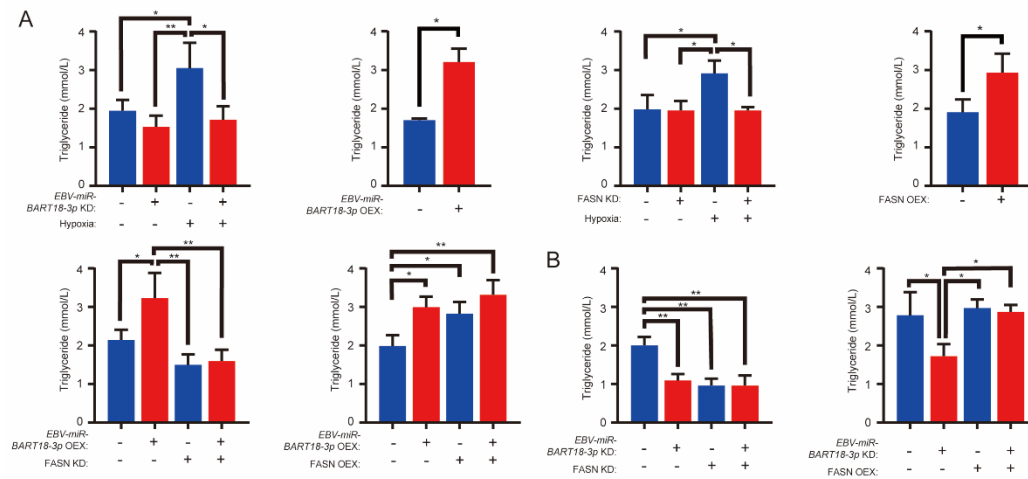



**Figure. S15** *EBV-miR-BART18-3p* enhances FASN-mediated lipid droplets in SW480 cells. Immunofluorescence assays showing the expression levels and intracellular localization of lipid droplets in CRC cells.

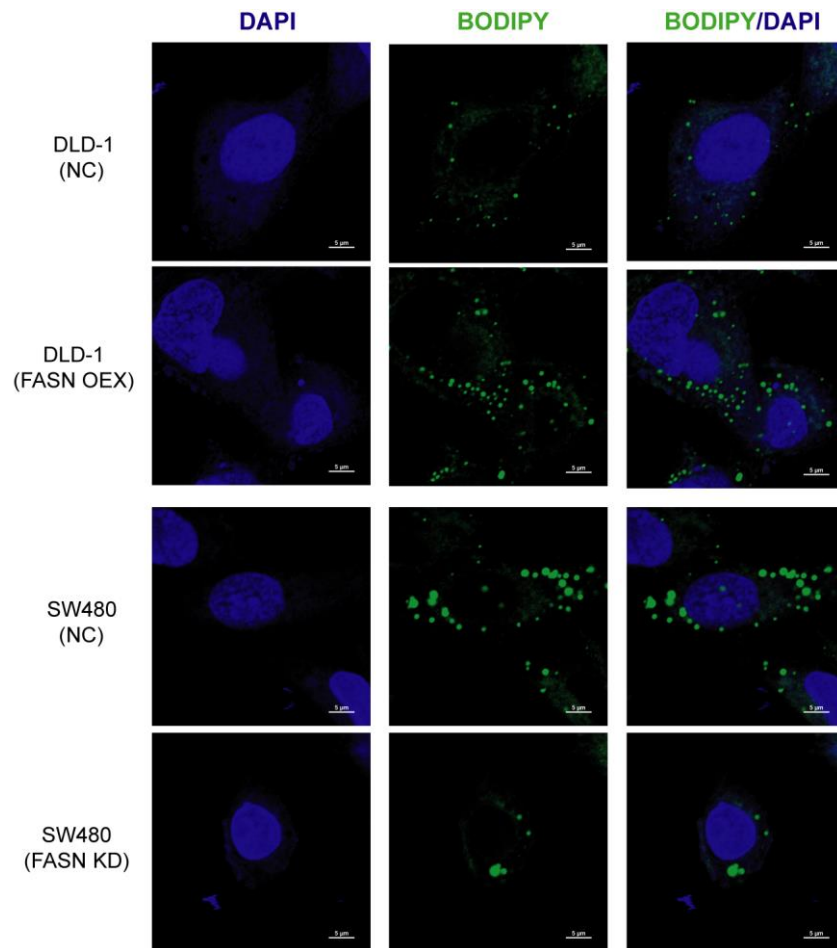

Figure. S16 Body weights of mice after antagomir-*EBV-miR-BART18-3p* injection.

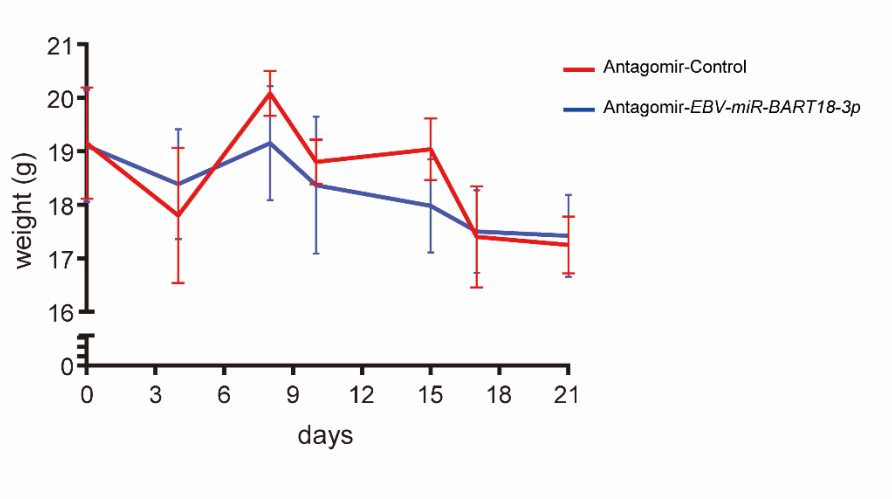

---

**Supplementary tables****Table. S1** Demographic characteristics of CRC patients subjected to miRNA microarray analysis[2].

| ID | Gender | Age | Diagnosis | Stage |
|----|--------|-----|-----------|-------|
| 1  | Male   | 68  | CRC       | I     |
| 2  | Male   | 73  | CRC       | I     |
| 3  | Female | 68  | CRC       | I     |
| 4  | Male   | 62  | CRC       | II    |
| 5  | Female | 60  | CRC       | 0     |
| 6  | Female | 59  | CRC       | II    |
| 7  | Female | 64  | ADE       | --    |
| 8  | Male   | 60  | ADE       | --    |
| 9  | Male   | 54  | ADE       | --    |
| 10 | Male   | 59  | ADE       | --    |
| 11 | Male   | 65  | ADE       | --    |
| 12 | Female | 52  | ADE       | --    |

CRC: colorectal cancer; ADE: colorectal adenoma

**Table. S2** Fold change and *P* values of differentially expression microRNAs

| microRNA                 | CRC vs. ANT |                | CRC vs. ADE |                |
|--------------------------|-------------|----------------|-------------|----------------|
|                          | Fold change | <i>P</i> value | Fold change | <i>P</i> value |
| <i>EBV-miR-BART18-3p</i> | 1.4705      | 4.43E-04       | 2.8895      | 8.48E-08       |
| <i>hsa-miR-135a-5p</i>   | 5.0650      | 1.39E-03       | 2.1942      | 1.31E-02       |
| <i>hsa-miR-204-5p</i>    | 2.7127      | 1.01E-02       | -4.4540     | 2.18E-05       |

CRC: colorectal cancer; ANT: adjacent noncancerous tissue; ADE: colorectal adenoma

**Table. S3** Demographic information of CRC and ADE patients for *EBV-miR-BART18-3p* expression PCR analysis.

| Variables          | Testing set (n = 322) |                     | Validation set (n = 81) |                     | Combined set (n = 403) |                     |
|--------------------|-----------------------|---------------------|-------------------------|---------------------|------------------------|---------------------|
|                    | CRC (n%)              | healthy donors (n%) | CRC (n%)                | healthy donors (n%) | CRC (n%)               | healthy donors (n%) |
| Age                |                       |                     |                         |                     |                        |                     |
| ≤61                | 185 (57.5)            | 183 (56.8)          | 40 (49.4)               | 43 (53.1)           | 225 (55.8)             | 226 (56.1)          |
| >61                | 137 (42.5)            | 139 (43.2)          | 41 (50.6)               | 38 (46.9)           | 178 (44.2)             | 177 (43.9)          |
| Gender             |                       |                     |                         |                     |                        |                     |
| Male               | 167 (51.9)            | 157 (48.8)          | 34 (42.0)               | 43 (53.1)           | 201 (49.9)             | 200 (49.6)          |
| Female             | 155 (48.1)            | 165 (51.2)          | 47 (58.0)               | 38 (46.9)           | 202 (50.1)             | 203 (50.4)          |
| Location           |                       |                     |                         |                     |                        |                     |
| Colon              | 134 (41.6)            |                     | 36 (44.4)               |                     | 170 (42.2)             |                     |
| Rectum             | 188 (58.4)            |                     | 45 (55.6)               |                     | 233 (57.8)             |                     |
| Grade              |                       |                     |                         |                     |                        |                     |
| Low                | 131 (40.7)            |                     | 38 (47.0)               |                     | 169 (41.9)             |                     |
| High               | 191 (59.3)            |                     | 43 (53.0)               |                     | 234 (58.1)             |                     |
| Depth of invasion  |                       |                     |                         |                     |                        |                     |
| T1                 | 7 (2.2)               |                     | 4 (4.9)                 |                     | 11 (2.7)               |                     |
| T2                 | 69 (21.4)             |                     | 36 (44.4)               |                     | 105 (26.1)             |                     |
| T3                 | 88 (27.3)             |                     | 19 (23.5)               |                     | 107 (26.6)             |                     |
| T4                 | 158 (49.1)            |                     | 22 (27.2)               |                     | 180 (44.7)             |                     |
| Lymph metastasis   |                       |                     |                         |                     |                        |                     |
| N0                 | 125 (38.8)            |                     | 31 (38.3)               |                     | 156 (38.7)             |                     |
| N1                 | 197 (61.2)            |                     | 50 (61.7)               |                     | 247 (61.3)             |                     |
| Distant metastasis |                       |                     |                         |                     |                        |                     |
| M0                 | 243 (75.5)            |                     | 62 (76.5)               |                     | 305 (75.7)             |                     |

---

|     |            |           |            |
|-----|------------|-----------|------------|
| M1  | 79 (24.5)  | 19 (23.5) | 98 (24.3)  |
| TNM |            |           |            |
| I   | 42 (13.0)  | 11 (13.6) | 53 (13.2)  |
| II  | 72 (22.4)  | 20 (24.7) | 92 (22.8)  |
| III | 129 (40.1) | 31 (38.3) | 160 (39.7) |
| IV  | 79 (24.5)  | 19 (23.4) | 98 (24.3)  |

---

CRC: colorectal cancer; ADE: colorectal adenoma

**Table.S4** Demographic information of CRC patients subjected to TMA[4].

| Variables             | Testing set<br>(n = 862) |      | Validation set<br>(n = 216) |      | Combined set<br>(N=1078) |      |
|-----------------------|--------------------------|------|-----------------------------|------|--------------------------|------|
|                       | n                        | %    | n                           | %    | n                        | %    |
| Age                   |                          |      |                             |      |                          |      |
| ≤55                   | 427                      | 49.5 | 103                         | 47.7 | 530                      | 49.2 |
| >55                   | 435                      | 50.5 | 113                         | 52.3 | 548                      | 50.8 |
| Gender                |                          |      |                             |      |                          |      |
| Male                  | 526                      | 61.0 | 133                         | 61.6 | 659                      | 61.1 |
| Female                | 336                      | 39.0 | 83                          | 38.4 | 419                      | 38.9 |
| Location              |                          |      |                             |      |                          |      |
| Colon                 | 379                      | 44.0 | 96                          | 44.4 | 475                      | 44.1 |
| Rectum                | 483                      | 56.0 | 120                         | 55.6 | 603                      | 55.9 |
| Grade                 |                          |      |                             |      |                          |      |
| Low                   | 284                      | 32.9 | 72                          | 33.3 | 356                      | 33.0 |
| Intermediate/High     | 578                      | 67.1 | 144                         | 66.7 | 722                      | 67.0 |
| Depth of invasion     |                          |      |                             |      |                          |      |
| T1                    | 29                       | 3.4  | 6                           | 2.8  | 35                       | 3.3  |
| T2                    | 191                      | 22.2 | 53                          | 24.5 | 244                      | 22.6 |
| T3                    | 163                      | 18.9 | 41                          | 19.0 | 204                      | 18.9 |
| T4                    | 479                      | 55.6 | 116                         | 53.7 | 595                      | 55.2 |
| Lymph node metastasis |                          |      |                             |      |                          |      |
| N0                    | 491                      | 57.0 | 130                         | 60.2 | 621                      | 57.6 |
| N1                    | 371                      | 43.0 | 86                          | 39.8 | 457                      | 42.4 |
| Distant metastasis    |                          |      |                             |      |                          |      |
| M0                    | 764                      | 88.6 | 194                         | 89.8 | 958                      | 88.9 |
| M1                    | 98                       | 11.4 | 22                          | 10.2 | 120                      | 11.1 |
| TNM                   |                          |      |                             |      |                          |      |
| I                     | 153                      | 17.7 | 43                          | 19.9 | 196                      | 18.2 |
| II                    | 320                      | 37.1 | 81                          | 37.5 | 401                      | 37.2 |
| III                   | 292                      | 33.9 | 69                          | 31.9 | 361                      | 33.5 |
| IV                    | 97                       | 11.3 | 23                          | 10.7 | 120                      | 11.1 |

**Table. S5** Correlation between the expression of *miR-EBV-BART18-3p* in TMAs and selected clinicopathologic features

| Variables <sup>a</sup> | Testing set (n = 839) |            |        | Validation set (n = 210) |           |        | Combined set (n = 1,049) |            |        |
|------------------------|-----------------------|------------|--------|--------------------------|-----------|--------|--------------------------|------------|--------|
|                        | Low (%)               | High (%)   | P      | Low (%)                  | High (%)  | P      | Low (%)                  | High (%)   | P      |
| All patients           | 491 (58.5)            | 348 (41.5) |        | 128 (61.0)               | 82 (39.0) |        | 619 (59.0)               | 430 (41.0) |        |
| Age                    |                       |            | 0.0852 |                          |           | 0.7874 |                          |            | 0.0948 |
| ≤55                    | 230 (46.8)            | 184 (52.9) |        | 60 (46.9)                | 40 (48.8) |        | 290 (46.9)               | 224 (52.1) |        |
| >55                    | 261 (53.2)            | 164 (47.1) |        | 68 (53.1)                | 42 (51.2) |        | 329 (53.2)               | 206 (47.9) |        |
| Gender                 |                       |            | 0.4842 |                          |           | 0.6360 |                          |            | 0.405  |
| Males                  | 293 (59.7)            | 216 (62.1) |        | 77 (60.2)                | 52 (63.4) |        | 370 (59.8)               | 268 (62.3) |        |
| Females                | 198 (40.3)            | 132 (37.9) |        | 51 (39.8)                | 30 (36.6) |        | 249 (40.2)               | 162 (37.7) |        |
| Location               |                       |            | 0.1566 |                          |           | 0.3805 |                          |            | 0.0977 |
| Colon                  | 203 (41.3)            | 161 (46.3) |        | 53 (41.4)                | 39 (47.6) |        | 256 (41.4)               | 200 (46.5) |        |
| Rectal                 | 288 (58.7)            | 187 (53.7) |        | 75 (58.6)                | 43 (52.4) |        | 363 (58.6)               | 230 (53.5) |        |
| Grade                  |                       |            | 0.0095 |                          |           | 0.2218 |                          |            | 0.0042 |
| Low                    | 143 (29.1)            | 131 (37.6) |        | 38 (29.7)                | 31 (37.8) |        | 181 (29.2)               | 162 (37.7) |        |
| Intermediate<br>/High  | 348 (70.9)            | 217 (62.4) |        | 90 (70.3)                | 51 (62.2) |        | 438 (70.8)               | 268 (62.3) |        |
| T                      |                       |            | 0.0006 |                          |           | 0.2334 |                          |            | <.0001 |
| 1                      | 21 (4.3)              | 8 (2.3)    |        | 5 (3.9)                  | 1 (1.2)   |        | 26 (4.2)                 | 9 (2.1)    |        |
| 2                      | 131 (26.7)            | 61 (17.5)  |        | 36 (28.1)                | 16 (19.5) |        | 167 (27.0)               | 77 (17.9)  |        |
| 3                      | 98 (20.0)             | 61 (17.5)  |        | 25 (19.5)                | 15 (18.3) |        | 123 (19.9)               | 76 (17.7)  |        |
| 4                      | 241 (49.1)            | 218 (62.6) |        | 62 (48.4)                | 50 (61.0) |        | 303 (49.0)               | 268 (62.3) |        |
| N                      |                       |            | <.0001 |                          |           | <.0001 |                          |            | <.0001 |
| 0                      | 399 (81.3)            | 89 (25.6)  |        | 106 (82.8)               | 22 (26.8) |        | 505 (81.6)               | 111 (25.8) |        |
| 1                      | 92 (18.7)             | 259 (74.4) |        | 22 (17.2)                | 60 (73.2) |        | 114 (18.4)               | 319 (74.2) |        |



---

|     |     |            |            |        |            |           |        |            |            |        |
|-----|-----|------------|------------|--------|------------|-----------|--------|------------|------------|--------|
| M   |     |            |            | <.0001 |            |           | <.0001 |            |            | <.0001 |
|     | 0   | 479 (97.6) | 276 (79.3) |        | 126 (98.4) | 64 (78.0) |        | 605 (97.7) | 340 (79.1) |        |
|     | 1   | 12 (2.4)   | 72 (20.7)  |        | 2 (1.6)    | 18 (22.0) |        | 14 (2.3)   | 90 (20.9)  |        |
| TNM |     |            |            | <.0001 |            |           | <.0001 |            |            | <.0001 |
|     | I   | 131 (26.7) | 21 (6.0)   |        | 38 (29.7)  | 6 (7.3)   |        | 169 (27.3) | 27 (6.3)   |        |
|     | II  | 264 (53.8) | 53 (15.2)  |        | 68 (53.1)  | 12 (14.6) |        | 332 (53.6) | 65 (15.1)  |        |
|     | III | 83 (16.9)  | 202 (58.0) |        | 21 (16.4)  | 46 (56.1) |        | 104 (16.8) | 248 (57.7) |        |
|     | IV  | 13 (2.6)   | 72 (20.7)  |        | 1 (0.8)    | 18 (22.0) |        | 14 (2.3)   | 90 (20.9)  |        |

---

<sup>a</sup> Some cases lack information on the selected variables.

**Table. S6** Multivariate Cox regression analysis of *miR-EBV-BART18-3p* expression in TMAs and selected clinicopathologic variables predicting overall survival.

| Variables                         | Testing set (n = 839)             |                       | Validation set (n = 210)          |                       | Combined set (n = 1,049)          |                       |
|-----------------------------------|-----------------------------------|-----------------------|-----------------------------------|-----------------------|-----------------------------------|-----------------------|
|                                   | Adjusted HR (95% CI) <sup>a</sup> | <i>P</i> <sup>a</sup> | Adjusted HR (95% CI) <sup>a</sup> | <i>P</i> <sup>a</sup> | Adjusted HR (95% CI) <sup>a</sup> | <i>P</i> <sup>a</sup> |
| Age (>55 VS. ≤55)                 | 1.63 (1.36–1.96)                  | <.0001                | 2.23 (1.48–3.35)                  | 0.0001                | 1.71 (1.45–2.02)                  | <.0001                |
| Gender (Females VS. Males)        | 0.89 (0.74–1.06)                  | 0.1963                | 0.79 (0.53–1.17)                  | 0.2358                | 0.87 (0.74–1.03)                  | 0.1                   |
| Location (Rectum VS. Colon)       | 0.82 (0.69–0.98)                  | 0.0312                | 0.73 (0.50–1.07)                  | 0.1045                | 0.80 (0.69–0.94)                  | 0.0072                |
| Grade (Intermediate/High VS. low) | 0.86 (0.72–1.03)                  | 0.1061                | 0.83 (0.56–1.25)                  | 0.3764                | 0.86 (0.73–1.01)                  | 0.0669                |
| TNM (III/IV VS. I/II)             | 3.05 (2.46–3.78)                  | <.0001                | 4.24 (2.56–7.03)                  | <.0001                | 3.20 (2.63–3.89)                  | <.0001                |
| EBV–miR-BART18-3p (High VS. Low)  | 3.72 (3.01–4.60)                  | <.0001                | 3.59 (2.21–5.83)                  | <.0001                | 3.72 (3.07–4.51)                  | <.0001                |

<sup>a</sup> Adjusted for age, gender, location (Colon or Rectum), grade (low VS. Intermediate/High) clinical stage (I/II VS. III/IV), and BART18-3p expression.

---

**Table. S7** KEGG analysis of black module genes.

| Pathway name                                                                          | Pathway source | Overlapping genes  | <i>P</i> value |
|---------------------------------------------------------------------------------------|----------------|--------------------|----------------|
| hypoxia-inducible factor pathway                                                      | BioCarta       | CREB1; <b>LDHA</b> | 0.000163       |
| mRNA Processing                                                                       | Wikipathways   | SNRPD3; CLK4; RBM5 | 0.000518       |
| HIF-1-alpha transcription factor network                                              | PID            | CREB1; <b>LDHA</b> | 0.00284        |
| TSH signaling pathway                                                                 | Wikipathways   | CREB1; TTF2        | 0.00321        |
| Thyroid hormone synthesis - Homo sapiens (human)                                      | KEGG           | CREB1; TTF2        | 0.00381        |
| inhibition of huntingtons disease neurodegeneration by histone deacetylase inhibitors | BioCarta       | CREB1              | 0.00389        |
| dermatan sulfate biosynthesis (late stages)                                           | HumanCyc       | CHST15             | 0.00519        |
| lactate fermentation (reoxidation of cytosolic NADH)                                  | HumanCyc       | <b>LDHA</b>        | 0.00648        |
| asparagine degradation                                                                | HumanCyc       | AGA                | 0.00648        |
| pyrimidine deoxyribonucleosides salvage                                               | HumanCyc       | TK2                | 0.00648        |

---

**Table. S8** Expression of LDHA in TMAs and selected clinicopathologic features.

| Variables         | Testing set (n = 821) |            |        | Validation set (n = 209) |           |        | Combined set (n = 1,030) |            |        |
|-------------------|-----------------------|------------|--------|--------------------------|-----------|--------|--------------------------|------------|--------|
|                   | Low (%)               | High (%)   | P      | Low (%)                  | High (%)  | P      | Low (%)                  | High (%)   | P      |
| All patients      | 600 (73.1)            | 221 (26.9) |        | 156 (74.7)               | 53 (25.3) |        | 756 (73.4)               | 274 (26.6) |        |
| Age               |                       |            | 0.8393 |                          |           | 0.6654 |                          |            | 0.7132 |
| ≤55               | 298 (49.7)            | 108 (48.9) |        | 76 (48.7)                | 24 (45.3) |        | 374 (49.5)               | 132 (48.2) |        |
| >55               | 302 (50.3)            | 113 (51.1) |        | 80 (51.3)                | 29 (54.7) |        | 382 (50.5)               | 142 (51.8) |        |
| Gender            |                       |            | 0.3152 |                          |           | 0.8599 |                          |            | 0.4085 |
| Males             | 368 (61.3)            | 127 (57.5) |        | 95 (60.9)                | 33 (62.3) |        | 463 (61.2)               | 160 (58.4) |        |
| Females           | 232 (38.7)            | 94 (42.5)  |        | 61 (39.1)                | 20 (37.7) |        | 293 (38.8)               | 114 (41.6) |        |
| Location          |                       |            | 0.7860 |                          |           | 0.9768 |                          |            | 0.7944 |
| Colon             | 267 (44.5)            | 96 (43.4)  |        | 71 (45.5)                | 24 (45.3) |        | 338 (44.7)               | 120 (43.8) |        |
| Rectal            | 333 (55.5)            | 125 (56.6) |        | 85 (54.5)                | 29 (54.7) |        | 418 (55.3)               | 154 (56.2) |        |
| Grade             |                       |            | 0.0144 |                          |           | 0.5512 |                          |            | 0.014  |
| Low               | 182 (30.3)            | 87 (39.4)  |        | 49 (31.4)                | 19 (35.8) |        | 231 (30.6)               | 106 (38.7) |        |
| Intermediate/High | 418 (69.7)            | 134 (60.6) |        | 107 (68.6)               | 34 (64.2) |        | 525 (69.4)               | 168 (61.3) |        |
| T                 |                       |            | 0.0013 |                          |           | 0.2155 |                          |            | 0.0002 |
| 1                 | 21 (3.5)              | 5 (2.3)    |        | 5 (3.2)                  | 1 (1.9)   |        | 26 (3.4)                 | 6 (2.2)    |        |
| 2                 | 147 (24.5)            | 34 (15.4)  |        | 41 (26.3)                | 9 (17.0)  |        | 188 (24.9)               | 43 (15.7)  |        |
| 3                 | 119 (19.8)            | 33 (14.9)  |        | 33 (21.2)                | 8 (15.1)  |        | 152 (20.1)               | 41 (15.1)  |        |
| 4                 | 313 (52.2)            | 149 (67.4) |        | 77 (49.4)                | 35 (66.0) |        | 390 (51.6)               | 184 (67.0) |        |
| N                 |                       |            | <.0001 |                          |           | <.0001 |                          |            | <.0001 |
| 0                 | 392 (65.3)            | 76 (34.4)  |        | 108 (69.2)               | 18 (34.0) |        | 500 (66.1)               | 94 (34.3)  |        |
| 1                 | 208 (34.7)            | 145 (65.6) |        | 48 (30.8)                | 35 (66.0) |        | 256 (33.9)               | 180 (65.7) |        |
| M                 |                       |            | 0.0039 |                          |           | 0.0520 |                          |            | 0.0006 |
| 0                 | 545 (90.8)            | 185 (83.7) |        | 144 (92.3)               | 44 (83.0) |        | 689 (91.1)               | 229 (83.6) |        |
| 1                 | 55 (9.2)              | 36 (16.3)  |        | 12 (7.7)                 | 9 (17.0)  |        | 67 (8.9)                 | 45 (16.4)  |        |
| TNM               |                       |            | <.0001 |                          |           | 0.0002 |                          |            | <.0001 |
| I                 | 123 (20.5)            | 22 (10.0)  |        | 36 (23.1)                | 6 (11.3)  |        | 159 (21.0)               | 28 (10.2)  |        |
| II                | 256 (42.7)            | 47 (21.3)  |        | 69 (44.2)                | 11 (20.8) |        | 325 (43.0)               | 58 (21.2)  |        |
| III               | 166 (27.7)            | 115 (52.0) |        | 39 (25.0)                | 28 (52.7) |        | 205 (27.1)               | 143 (52.2) |        |
| IV                | 55 (9.2)              | 37 (16.7)  |        | 12 (7.7)                 | 8 (15.1)  |        | 67 (8.9)                 | 45 (16.4)  |        |

<sup>a</sup> Some cases lack information on the selected variables.

**Table. S9** Multivariate Cox regression analysis of LDHA expression in TMAs and selected clinicopathologic variables predicting overall survival.

| Variables                         | Testing set (n = 821)             |                | Validation set (n = 209)          |                | Combined set (n = 1,030)          |                |
|-----------------------------------|-----------------------------------|----------------|-----------------------------------|----------------|-----------------------------------|----------------|
|                                   | Adjusted HR (95% CI) <sup>a</sup> | P <sup>a</sup> | Adjusted HR (95% CI) <sup>a</sup> | P <sup>a</sup> | Adjusted HR (95% CI) <sup>a</sup> | P <sup>a</sup> |
| Age (>55 VS. ≤55)                 | 1.44 (1.21–1.72)                  | <.0001         | 1.82 (1.22–2.74)                  | 0.0037         | 1.48 (1.26–1.74)                  | <.0001         |
| Gender (Females VS. Males)        | 0.88 (0.73–1.06)                  | 0.1831         | 0.68 (0.46–1.00)                  | 0.0491         | 0.85 (0.72–1.00)                  | 0.0455         |
| Location (Rectum VS. Colon)       | 0.86 (0.72–1.03)                  | 0.0913         | 0.60 (0.41–0.88)                  | 0.0098         | 0.81 (0.69–0.95)                  | 0.0107         |
| Grade (Intermediate/High VS. Low) | 0.88 (0.73–1.06)                  | 0.1655         | 0.97 (0.65–1.45)                  | 0.8987         | 0.89 (0.76–1.06)                  | 0.1867         |
| TNM (III/IV VS. I/II)             | 4.54 (3.73–5.53)                  | <.0001         | 7.04 (4.55–10.89)                 | <.0001         | 4.83 (4.04–5.78)                  | <.0001         |
| LDHA (High VS. Low)               | 2.16 (1.79–2.61)                  | <.0001         | 1.59 (1.27–3.50)                  | <.0001         | 2.20 (1.85–2.61)                  | <.0001         |

<sup>a</sup> Adjusted for age, gender, location (Colon or Rectum), grade (low VS. Intermediate/High), clinical stage (I/II VS. III/IV) and LDHA expression.

**Table. S10** KEGG enrichment of differentially expressed genes by RNA-seq assay

| KEGG Term                                                  | ID       | P-Value  | Corrected P-Value | Input                  |
|------------------------------------------------------------|----------|----------|-------------------|------------------------|
| AMPK signaling pathway                                     | hsa04152 | 0.011508 | 0.161675          | TSC2,<br><b>FASN</b>   |
| Insulin signaling pathway                                  | hsa04910 | 0.014637 | 0.161675          | TSC2,<br><b>FASN</b>   |
| Fatty acid biosynthesis                                    | hsa00061 | 0.017935 | 0.161675          | <b>FASN</b>            |
| Collecting duct acid secretion                             | hsa04966 | 0.035558 | 0.161675          | TCIRG1                 |
| Homologous recombination                                   | hsa03440 | 0.036805 | 0.161675          | XRCC2                  |
| Circadian rhythm                                           | hsa04710 | 0.040537 | 0.161675          | BHLHE40                |
| ABC transporters                                           | hsa02010 | 0.056547 | 0.161675          | ABCA3                  |
| Fatty acid metabolism                                      | hsa01212 | 0.060205 | 0.161675          | <b>FASN</b>            |
| Vibrio cholerae infection                                  | hsa05110 | 0.068686 | 0.161675          | TCIRG1                 |
| Acute myeloid leukemia                                     | hsa05221 | 0.072298 | 0.161675          | JUP                    |
| mTOR signaling pathway                                     | hsa04150 | 0.075897 | 0.161675          | TSC2                   |
| Synaptic vesicle cycle                                     | hsa04721 | 0.079482 | 0.161675          | TCIRG1                 |
| Epithelial cell signaling in Helicobacter pylori infection | hsa05120 | 0.085427 | 0.161675          | TCIRG1                 |
| p53 signaling pathway                                      | hsa04115 | 0.085427 | 0.161675          | TSC2                   |
| PPAR signaling pathway                                     | hsa03320 | 0.086612 | 0.161675          | ANGPTL4                |
| Arrhythmogenic right ventricular cardiomyopathy (ARVC)     | hsa05412 | 0.092512 | 0.161897          | JUP                    |
| Rheumatoid arthritis                                       | hsa05323 | 0.1123   | 0.184965          | TCIRG1                 |
| Thyroid hormone signaling pathway                          | hsa04919 | 0.143984 | 0.214007          | TSC2                   |
| Lysosome                                                   | hsa04142 | 0.147314 | 0.214007          | TCIRG1                 |
| Oxidative phosphorylation                                  | hsa00190 | 0.159414 | 0.214007          | TCIRG1                 |
| Ribosome                                                   | hsa03010 | 0.160505 | 0.214007          | RPS28P7                |
| Phagosome                                                  | hsa04145 | 0.183117 | 0.233058          | TCIRG1                 |
| Transcriptional misregulation in cancer                    | hsa05202 | 0.208237 | 0.242943          | JUP                    |
| Tuberculosis                                               | hsa05152 | 0.208237 | 0.242943          | TCIRG1                 |
| HTLV-I infection                                           | hsa05166 | 0.288549 | 0.323175          | ZFP36                  |
| Pathways in cancer                                         | hsa05200 | 0.347408 | 0.374132          | JUP                    |
| PI3K-Akt signaling pathway                                 | hsa04151 | 0.364294 | 0.377786          | TSC2                   |
| Metabolic pathways                                         | hsa01100 | 0.469994 | 0.469994          | TCIRG1,<br><b>FASN</b> |

**Table. S11** Expression of FASN in TMAs and selected clinicopathologic features

| Variables         | Testing set (n = 843) |            |        | Validation set (n = 199) |           |        | Combined set (n = 1,042) |            |        |
|-------------------|-----------------------|------------|--------|--------------------------|-----------|--------|--------------------------|------------|--------|
|                   | Low (%)               | High (%)   | P      | Low (%)                  | High (%)  | P      | Low (%)                  | High (%)   | P      |
| All patients      | 646 (77.5)            | 197 (22.5) |        | 151 (75.9)               | 48 (24.1) |        | 797 (76.5)               | 245 (23.5) |        |
| Age               |                       |            | 0.4994 |                          |           | 0.7616 |                          |            | 0.4571 |
| ≤55               | 326 (50.5)            | 94 (47.7)  |        | 73 (48.3)                | 22 (45.8) |        | 399 (50.1)               | 116 (47.4) |        |
| >55               | 320 (49.5)            | 103 (52.3) |        | 78 (51.7)                | 26 (54.2) |        | 398 (49.9)               | 129 (52.6) |        |
| Gender            |                       |            | 0.3758 |                          |           | 0.6497 |                          |            | 0.5266 |
| Males             | 491 (76.0)            | 123 (62.4) |        | 92 (60.9)                | 31 (64.6) |        | 483 (60.6)               | 154 (62.9) |        |
| Females           | 255 (39.5)            | 74 (37.6)  |        | 59 (39.1)                | 17 (35.4) |        | 314 (39.4)               | 91 (37.1)  |        |
| Location          |                       |            | 0.3066 |                          |           | 0.2818 |                          |            | 0.1641 |
| Colon             | 289 (44.7)            | 80 (40.6)  |        | 70 (46.4)                | 18 (37.5) |        | 359 (45.0)               | 98 (40.0)  |        |
| Rectal            | 357 (55.3)            | 117 (59.4) |        | 81 (53.6)                | 30 (62.5) |        | 438 (55.0)               | 147 (60.0) |        |
| Grade             |                       |            | 0.4063 |                          |           | 0.7038 |                          |            | 0.3612 |
| Low               | 209 (32.4)            | 70 (35.5)  |        | 49 (32.5)                | 17 (35.4) |        | 258 (32.4)               | 87 (35.5)  |        |
| Intermediate/High | 437 (67.6)            | 127 (64.5) |        | 102 (67.5)               | 31 (64.6) |        | 539 (67.6)               | 158 (64.5) |        |
| T                 |                       |            | 0.0022 |                          |           | 0.4789 |                          |            | 0.0007 |
| 1                 | 25 (3.9)              | 3 (1.5)    |        | 5 (3.3)                  | 1 (2.1)   |        | 30 (3.8)                 | 4 (1.6)    |        |
| 2                 | 153 (23.7)            | 34 (17.3)  |        | 39 (25.8)                | 9 (18.8)  |        | 192 (24.1)               | 43 (17.6)  |        |
| 3                 | 129 (20.0)            | 27 (13.7)  |        | 29 (19.2)                | 7 (14.6)  |        | 158 (19.8)               | 34 (13.9)  |        |
| 4                 | 339 (52.5)            | 133 (67.5) |        | 78 (51.7)                | 31 (64.6) |        | 417 (52.3)               | 164 (66.9) |        |
| N                 |                       |            | <.0001 |                          |           | <.0001 |                          |            | <.0001 |
| 0                 | 430 (66.6)            | 47 (23.9)  |        | 105 (69.5)               | 13 (27.1) |        | 535 (67.1)               | 60 (24.5)  |        |
| 1                 | 216 (33.4)            | 150 (76.1) |        | 46 (30.5)                | 35 (72.9) |        | 262 (32.9)               | 185 (75.5) |        |
| M                 |                       |            | <.0001 |                          |           | 0.0026 |                          |            | <.0001 |
| 0                 | 596 (92.3)            | 142 (72.1) |        | 140 (92.7)               | 37 (77.1) |        | 736 (92.4)               | 189 (77.1) |        |

---

|     |     |            |            |        |           |           |        |            |            |        |
|-----|-----|------------|------------|--------|-----------|-----------|--------|------------|------------|--------|
| TNM | I   | 50 (7.7)   | 45 (22.8)  |        | 11 (7.3)  | 11 (22.9) |        | 61 (7.6)   | 56 (22.9)  |        |
|     |     |            |            | <.0001 |           |           | <.0001 |            |            | <.0001 |
|     | I   | 138 (21.4) | 10 (5.1)   |        | 36 (23.8) | 4 (8.3)   |        | 174 (21.8) | 14 (5.7)   |        |
|     | II  | 282 (43.7) | 28 (14.2)  |        | 67 (44.4) | 7 (14.6)  |        | 349 (43.8) | 35 (14.3)  |        |
|     | III | 176 (27.2) | 113 (57.4) |        | 37 (24.5) | 27 (56.3) |        | 213 (26.7) | 140 (57.1) |        |
|     | IV  | 50 (7.7)   | 46 (23.4)  |        | 11 (7.3)  | 10 (20.8) |        | 61 (7.7)   | 56 (22.9)  |        |

---

<sup>a</sup> Some cases lack information on the selected variables.



**Table. S12** Multivariate cox regression analysis of FASN expression in TMAs and selected clinicopathologic variables predicting overall survival

| Variables                         | Testing set (n = 843) |                | Validation set (n = 199) |                | Combined set (n = 1,042) |                |
|-----------------------------------|-----------------------|----------------|--------------------------|----------------|--------------------------|----------------|
|                                   | Adjusted HR (95% CI)  | P <sup>a</sup> | Adjusted HR (95% CI)     | P <sup>a</sup> | Adjusted HR (95% CI)     | P <sup>a</sup> |
| Age (>55 VS. ≤55)                 | 1.37 (1.15–1.64)      | 0.0005         | 1.95 (1.31–2.91)         | 0.001          | 1.44 (1.23–1.70)         | <.000          |
| Gender (Females VS. Males)        | 0.93 (0.77–1.11)      | 0.4106         | 0.74 (0.50–1.08)         | 0.1145         | 0.89 (0.76–1.05)         | 0.1671         |
| Location (Rectum VS. Colon)       | 0.83 (0.69–0.99)      | 0.0378         | 0.61 (0.42–0.89)         | 0.0104         | 0.79 (0.67–0.93)         | 0.0039         |
| Grade (Intermediate/High VS. Low) | 0.88 (0.73–1.06)      | 0.1676         | 0.84 (0.57–1.24)         | 0.3813         | 0.88 (0.74–1.03)         | 0.1169         |
| TNM (III/IV VS. I/II)             | 4.77 (3.92–5.81)      | <.000          | 6.98 (4.56–10.68)        | <.000          | 5.04 (4.22–6.01)         | <.000          |
| FASN (High VS. Low)               | 2.20 (1.83–2.64)      | <.000          | 2.07 (1.40–3.06)         | 0.0003         | 2.19 (1.85–2.58)         | <.000          |

<sup>a</sup> Adjusted for age, gender, location (colon or rectum), grade (low VS. intermediate/high), clinical stage (I/II or III/IV) and FASN expression.

---

**Table. S13** Demographic characteristics of CRC patients and healthy donors subjected to EBV ELISA assays.

---

| Variables          | CRC (n%)   | Healthy donors (n%) |
|--------------------|------------|---------------------|
| Age                |            |                     |
| ≤61                | 142 (55.7) | 145 (57.1)          |
| >61                | 113 (44.3) | 109 (42.9)          |
| Gender             |            |                     |
| Male               | 151 (59.2) | 150 (59.1)          |
| Female             | 104 (40.8) | 104 (40.9)          |
| Location           |            |                     |
| Colon              | 97 (38.0)  |                     |
| Rectum             | 158 (62.0) |                     |
| Grade              |            |                     |
| Low                | 85 (33.3)  |                     |
| High               | 170 (66.7) |                     |
| Depth of invasion  |            |                     |
| T1                 | 6 (2.4)    |                     |
| T2                 | 65 (25.5)  |                     |
| T3                 | 79 (31.0)  |                     |
| T4                 | 105 (41.2) |                     |
| Lymph metastasis   |            |                     |
| N0                 | 93 (36.5)  |                     |
| N1                 | 162 (63.5) |                     |
| Distant metastasis |            |                     |
| M0                 | 196 (76.9) |                     |
| M1                 | 59 (23.1)  |                     |
| TNM                |            |                     |
| I                  | 23 (9.0)   |                     |
| II                 | 67 (26.3)  |                     |
| III                | 106 (41.6) |                     |
| IV                 | 59 (23.1)  |                     |

---

---

**Table. S14** Clinical characteristics of the patients used for developing PDX models

| Models | Sex    | Age (years) | 7 <sup>th</sup> Edition AJCC | Location | Diagnosis |
|--------|--------|-------------|------------------------------|----------|-----------|
| CRC-11 | Female | 48          | III                          | Rectal   | CRC       |
| CRC-12 | Male   | 52          | III                          | Rectal   | CRC       |
| CRC-14 | Female | 50          | III                          | Rectal   | CRC       |
| CRC-16 | Male   | 61          | III                          | Colon    | CRC       |
| CRC-19 | Female | 71          | III                          | Colon    | CRC       |
| CRC-21 | Female | 66          | III                          | Colon    | CRC       |
| CRC-23 | Male   | 51          | III                          | Colon    | CRC       |
